# Supplementary material for: Super-hydrophobic and photocatalytic antimicrobial activity of iodine-doped ZnO nanoarray films
Source: Royal Society of Chemistry journal article supplement (doi:10.1039/d1nj05706e), 2022-01-01

## Supporting information

### Super-hydrophobic and photocatalytic antimicrobial activity of iodine-doped ZnO nanoarray films

Fig.S1 SEM images of bare ZnO film and ZnO/ I-2

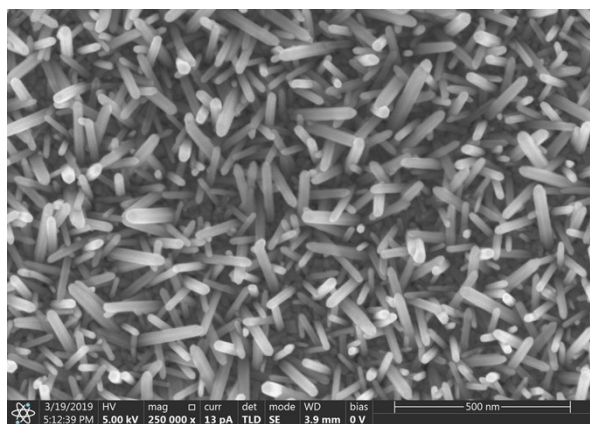

a: ZnO

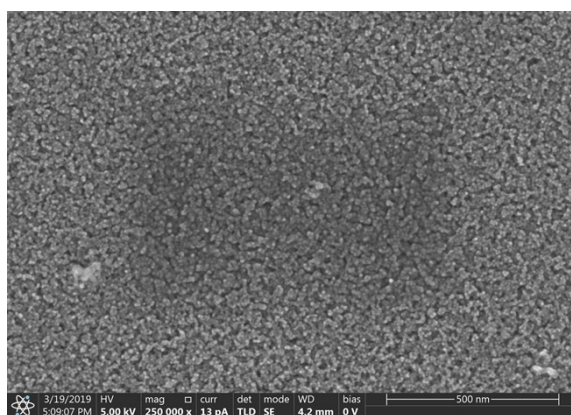

b: ZnO/ I-2

Fig.S2 The concentration of protein in bacterial solution of the photo-treated bacteria  
at different irradiation time intervals

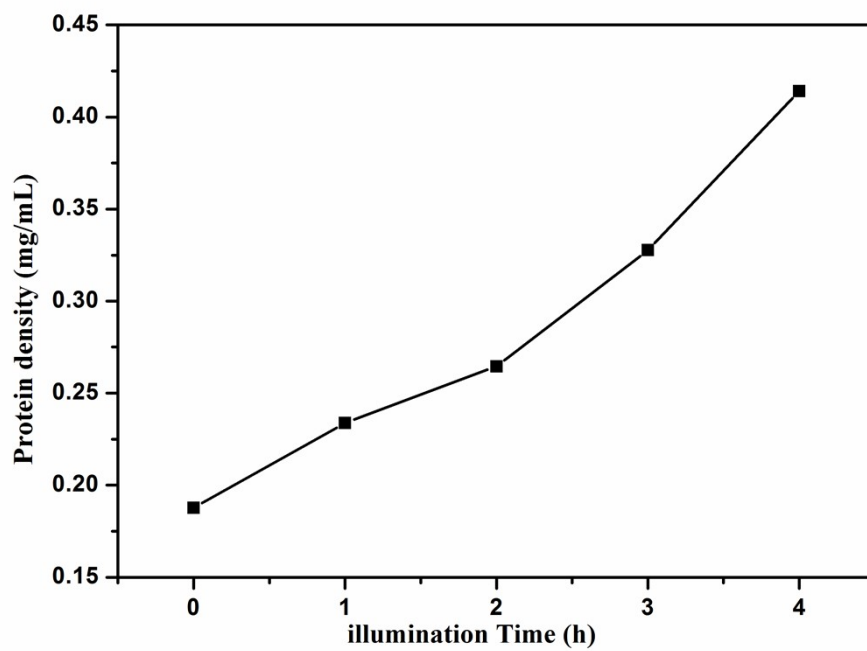

Fig.S3 Contact model between water droplet and film surface

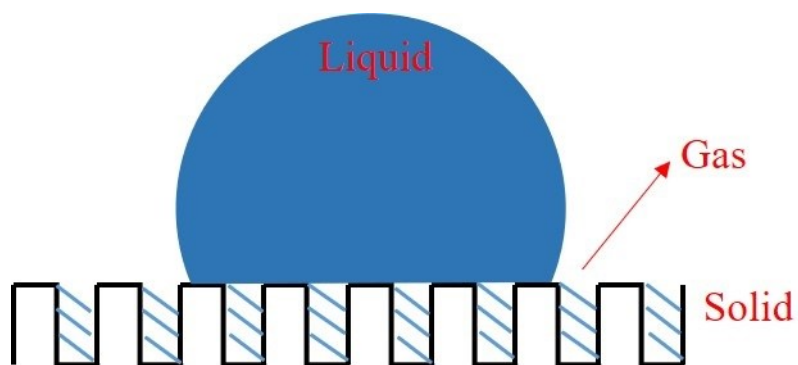

Supplement: d1nj05706e1.pdf [file d1nj05706e1.pdf]
